# Supplementary material for: Long QT syndrome: from channels to cardiac arrhythmias
Source: JCI journal article supplement (doi:10.1172/jci25537), 2005-08-01
Supplement: sd1 [file 1]

301 Moved Permanently

# Moved Permanently

The document has moved here.
