# Supplementary material for: Long QT syndrome: from channels to cardiac arrhythmias
Source: JCI journal article supplement (doi:10.1172/jci25537), 2005-08-01
Supplement: sd1 [file 1]

## Glossary

|                               |                                                                                                                                                                                                                                                                                                                                     |
|-------------------------------|-------------------------------------------------------------------------------------------------------------------------------------------------------------------------------------------------------------------------------------------------------------------------------------------------------------------------------------|
| Andersen-Tawil syndrome (ATS) | A disorder characterized by 3 features: episodic paralysis, ventricular arrhythmias, and prolonged QT interval. Approximately 60% of individuals with ATS have a mutation in KCNJ2, which encodes the inward rectifier potassium channel 2 protein, Kir2.1.                                                                         |
| Bradycardia                   | Abnormally slow heartbeat.                                                                                                                                                                                                                                                                                                          |
| Brugada syndrome              | A genetic, ion channel disorder associated with unique electrocardiographic manifestations and an increased risk for ventricular fibrillation.                                                                                                                                                                                      |
| QT interval                   | The time interval from the onset of the QRS deflection to the completion of the T wave on the ECG.                                                                                                                                                                                                                                  |
| Syncope                       | Transient loss of consciousness.                                                                                                                                                                                                                                                                                                    |
| Timothy syndrome (TS)         | A rare childhood disorder that leads to severe cardiac arrhythmia and cognitive and physical deficits. It is caused by a mutation in the Cav1.2 calcium channel.                                                                                                                                                                    |
| Torsade de pointes            | A form of polymorphic ventricular tachycardia characterized by a change in the amplitude and twisting of the QRS complexes. It is associated with a prolonged QT interval, and it usually terminates spontaneously but frequently persists and may worsen into sustained ventricular tachycardia (VT) and ventricular fibrillation. |
| Yotiao                        | An adapter protein involved in the $\beta$ -adrenergic receptor signaling cascade of the $I_{Ks}$ .                                                                                                                                                                                                                                 |
